# Supplementary material for: Percent-level production of 40 Ar by an overlooked mode of 40 K decay
Source: Copernicus journal article supplement (doi:10.5194/gchron-2020-9), 2020-04-22
Supplement: Supplementary file 1 [file gchron-2020-9-supplement.pdf]

Supplementary file for:

# Percent-level production of $^{40}\text{Ar}$ by an overlooked mode of $^{40}\text{K}$ decay

Jack Carter<sup>1</sup>, Ryan B. Ickert<sup>1,2</sup>, Darren F. Mark<sup>1,3</sup>, Marrison M. Tremblay<sup>2</sup>, Alan J. Cresswell<sup>1</sup>, David C.W. Sanderson<sup>1</sup>

<sup>1</sup>SUERC, Rankine Avenue, Scottish Enterprise Technology Park, East Kilbride, G75 0QF

<sup>2</sup>Department of Earth, Atmospheric, and Planetary Sciences, Purdue University, West Lafayette, IN 47901

<sup>3</sup>University of St Andrews, College Gate, St Andrews, KY16 9AJ, Fife, Scotland, UK

Correspondence to: J. Carter (j.carter.1@research.gla.ac.uk)

## X-ray counting experiment

We attempted a pilot study to test whether the characteristic  $\sim 3.2$  keV x-ray emitted during both ground state and excited state electron capture of  $^{40}\text{K}$  could be detected. In our experimental set-up, we used a 50 mm by 5 mm KCl disc as a  $^{40}\text{K}$  source and a thin Be-window Ge detector (Ortec LoAx). The source and detector were housed in Pb brick containment to limit x-rays from the surrounding environment. Counts were taken over  $\sim 250000$  s (approximately 2.9 days) to test the possibility of detection. We show example spectra of the background, KCl, and KCl with background subtracted below (Figure S1, A - C).

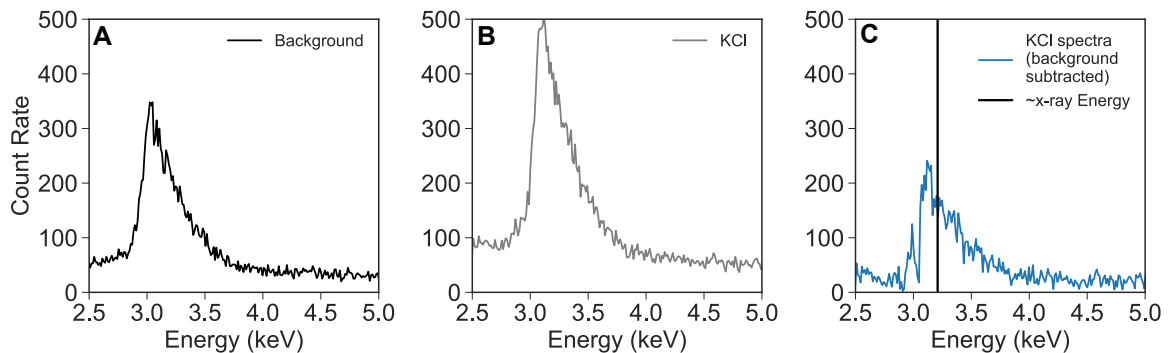

**Figure S1. (A) Spectrum measured for the laboratory background, (B) KCl spectrum, and (C) KCl spectrum with background subtracted (C). The detector resolution in the  $\sim 3$  keV region is approximately 50 eV at full-width half-maximum.**

The lower limit of x-ray energy detection is approximately 3 keV, resulting in an exponential noise pile across the energy region we are attempting to observe (Figure S1 A). Unfortunately, this noise pile-up dominates the region of interest during measurement (Figure S1 B). The Ar-K x-ray is detected (Figure S1 C), but is difficult to resolve from the noise pile up. Note that the characteristic x-ray does not appear at exactly 3.209 keV due to what we believe to be a non-linearity in the relationship between energy and channel number in the detector. This demonstrates that the  $^{40}\text{K}$  characteristic x-rays can be detected in our simple experimental configuration.

## Conclusions and Recommendations

The pilot study here shows the potential of determining the existence of the electron capture to ground state decay through the detection of characteristic  $\sim 3$  keV x-rays associated with the relaxation of the daughter  $^{40}\text{Ar}$  nucleus after decay. However, the absolute verification requires the detection of excess x-rays that are not coincident with the  $\gamma$ -ray from the de-excitation of  $^{40}\text{Ar}^{2+}$  to  $^{40}\text{Ar}^{0+}$ . In our experiment, a simple KCl source is used pressed to a thin disc to aid in the minimisation of self-absorption. However, this still results in a low count rate at the x-ray energy. Therefore, we recommend the use of a source enriched in  $^{40}\text{K}$ , and a thinner sample to limit x-ray self-absorption. We also recommend the use of a NaI detector which offers both greater resolution at low energies and a much lower detection limit. Furthermore, counting over a very long period, on the order of months, is required to accumulate enough measurements to yield a precise result. The low activity of the potassium may also require long counting experiments in extremely low background environments, such as the Boulby Dark Matter Laboratory.
